# Supplementary material
Source: PubMed Central journal article supplement (PMC7256355)
Supplement: TBSD_A_1768151_SM4601.pdf [file TBSD_A_1768151_SM4601.pdf]

## Supporting information

# Identification of potential molecules against COVID-19 main protease through structure-guided virtual screening approach

Lovika Mittal<sup>1,#</sup>, Anita Kumari<sup>1,#</sup>, Mitul Srivastava<sup>1,#</sup>, Mrityunjay Singh<sup>1</sup>, Shailendra Asthana<sup>1,\*</sup>

<sup>1</sup> Translational Health Science and Technology Institute (THSTI), Haryana, 121001, India

# These authors contributed equally

\* To whom the correspondence should be addressed.

### Dr. Shailendra Asthana

Translational Health Science and Technology Institute (THSTI),  
NCR Biotech Science Cluster, 3rd Milestone  
Faridabad – Gurgaon Expressway, Haryana-121001, India  
E-Mail: [sasthana@thsti.res.in](mailto:sasthana@thsti.res.in)

### Supplementary Figures:

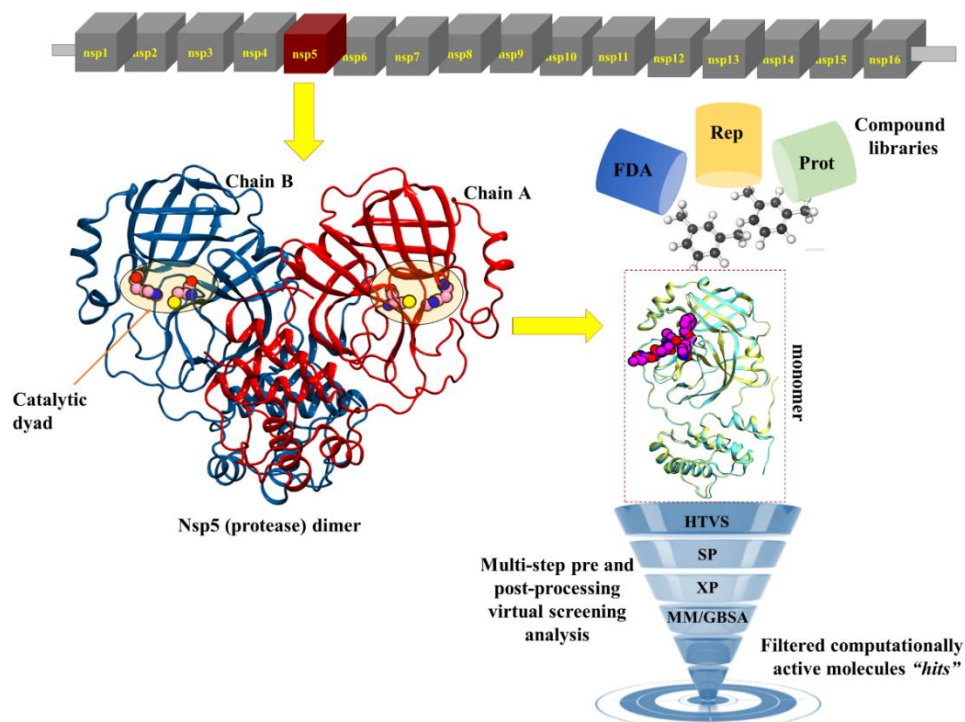

**Supplementary Figure 1:** The schematic representation of non-structural proteins of SARS-CoV-2. The targeted protein M<sup>Pro</sup> (main protease) is shown in red block. The modelled dimer was created. The crystal monomer 6LU7 was used for virtual screening and other post-processing analysis. **Rep** and **Prot** are repurpose and protease libraries.

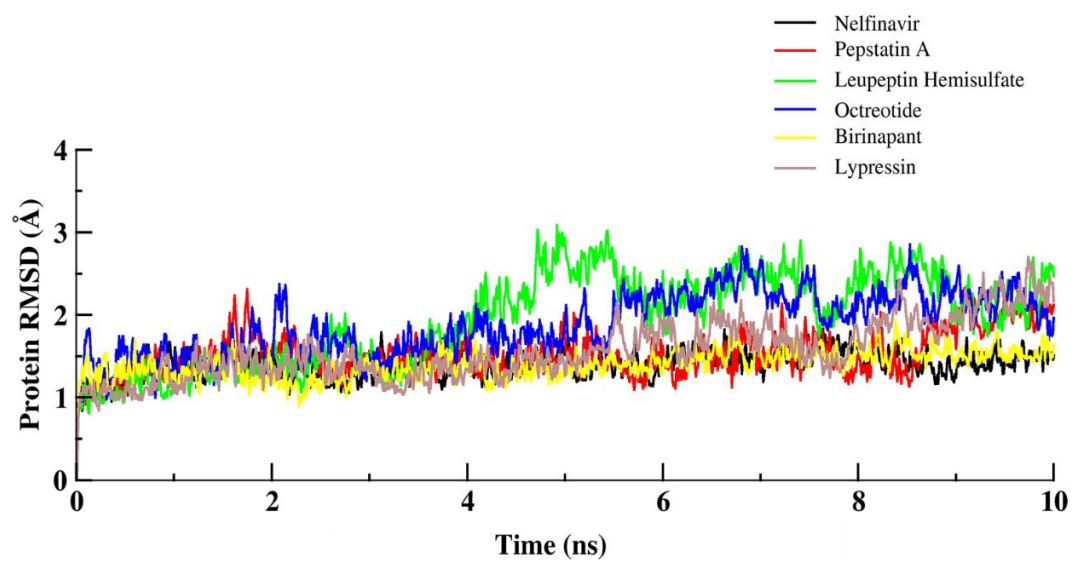

**Supplementary Figure 2:** Protein RMSD for the top 6 hits for 10ns MD simulation.

**Supplementary Table 1:** List of contributions from different components to the total Prime MM/GBSA  $\Delta G_{\text{bind}}$  (kcal/mol) calculated for top molecules and controls from equilibrated MD trajectory.

| Molecules             | MMGBSA $\Delta G_{\text{bind}}$ Coulomb <sup>a</sup> (kcal/mol) | MMGBSA $\Delta G_{\text{bind}}$ Covalent <sup>b</sup> (kcal/mol) | MMGBSA $\Delta G_{\text{bind}}$ Hbond <sup>c</sup> (kcal/mol) | MMGBSA $\Delta G_{\text{bind}}$ Lipo <sup>d</sup> (kcal/mol) | MMGBSA $\Delta G_{\text{bind}}$ Packing <sup>e</sup> (kcal/mol) | MMGBSA $\Delta G_{\text{bind}}$ Solv GB <sup>f</sup> (kcal/mol) | MMGBSA $\Delta G_{\text{bind}}$ vdW <sup>g</sup> (kcal/mol) | Prime MMGBSA $\Delta G_{\text{bind}}$ Total <sup>h</sup> (kcal/mol) |
|-----------------------|-----------------------------------------------------------------|------------------------------------------------------------------|---------------------------------------------------------------|--------------------------------------------------------------|-----------------------------------------------------------------|-----------------------------------------------------------------|-------------------------------------------------------------|---------------------------------------------------------------------|
| N3                    | -9.96                                                           | 1.40                                                             | -2.49                                                         | -14.05                                                       | 0                                                               | 25.45                                                           | -59.48                                                      | -59.13                                                              |
| 13b                   | -16.66                                                          | 4.66                                                             | -1.37                                                         | -15.68                                                       | -1.7                                                            | 27.21                                                           | -65.10                                                      | -68.64                                                              |
| Nelfinavir            | -60.66                                                          | 3.81                                                             | -1.44                                                         | -15.94                                                       | -2.35                                                           | 58.86                                                           | -41.66                                                      | -59.38                                                              |
| Pepstatin A           | -2.27                                                           | 4.96                                                             | -2.49                                                         | -16.9                                                        | 0                                                               | 9.21                                                            | -66.78                                                      | -74.27                                                              |
| Leupeptin Hemisulfate | -111.7                                                          | 3.22                                                             | -3.89                                                         | -9.84                                                        | 0                                                               | 115.46                                                          | -50.17                                                      | -56.92                                                              |
| Octreotide            | -38.81                                                          | 3.69                                                             | -4.53                                                         | -14.28                                                       | -1.94                                                           | 42.76                                                           | -51.61                                                      | -64.72                                                              |
| Birinapant            | -45.15                                                          | 11.03                                                            | -2.5                                                          | -17.93                                                       | -3.79                                                           | 49.16                                                           | -65.86                                                      | -75.04                                                              |
| Lypressin             | -100.29                                                         | 8.99                                                             | -6.16                                                         | -18.49                                                       | -0.63                                                           | 88.03                                                           | -84.05                                                      | -112.60                                                             |

<sup>a</sup>Coulomb energy

<sup>b</sup>Covalent binding energy

<sup>c</sup>Hydrogen bonding correction

<sup>d</sup>Lipophilic energy

<sup>e</sup>Pi-pi packing correction

<sup>f</sup>Generalised born electrostatic solvation energy

<sup>g</sup>Van der Waals energy

<sup>h</sup>Total binding free energy
